# Supplementary material for: Germline Genetic Association between Stromal Interaction Molecule 1 (STIM1) and Clinical Outcomes in Breast Cancer Patients
Source: MDPI journal article supplement (doi:10.3390/jpm10040287), 2020-12-17
Supplement: s1 [file s1]

**Supplementary Table S1. Association analysis between germline genetic polymorphisms of *STIM1* and TNM stage in progesterone receptor (PR) positive breast cancer patients**

| dbSNV ID  | Genotype | Late stage <sup>a</sup><br>N (%) | Early stage <sup>b</sup><br>N (%) | Genotype model             |                               |
|-----------|----------|----------------------------------|-----------------------------------|----------------------------|-------------------------------|
|           |          |                                  |                                   | OR (95% C.I.) <sup>c</sup> | <i>p</i> value                |
| rs2304891 | G/G      | 8 (32.0)                         | 17 (14.7)                         | 10.51 (2.02~54.74)         | <b>3.47×10<sup>-3**</sup></b> |
|           | A/G      | 15 (60.0)                        | 55 (47.4)                         | 6.02 (1.31~27.75)          |                               |
|           | A/A      | 2 (8.0)                          | 44 (37.9)                         | Reference                  |                               |
| rs3750996 | G/G      | 0 (0)                            | 7 (5.9)                           | 0                          | <b>8.53×10<sup>-3*</sup></b>  |
|           | A/G      | 3 (12.0)                         | 41 (34.7)                         | 0.23 (0.07~0.82)           |                               |
|           | A/A      | 22 (88.0)                        | 70 (59.3)                         | Reference                  |                               |
| rs1561876 | G/G      | 0 (0)                            | 10 (8.9)                          | 0                          | 0.1038                        |
|           | A/G      | 14 (58.3)                        | 51 (45.5)                         | 1.40 (0.57~3.44)           |                               |
|           | A/A      | 10 (41.7)                        | 51 (45.5)                         | Reference                  |                               |
| rs3750994 | G/G      | 1 (4.3)                          | 5 (4.2)                           | 1.02 (0.11~9.79)           | 0.9826                        |
|           | T/G      | 9 (39.1)                         | 44 (37.3)                         | 1.09 (0.43~2.78)           |                               |
|           | T/T      | 13 (56.5)                        | 69 (58.5)                         | Reference                  |                               |

The *p* value was adjusted for age. \**p* value <0.05 and \*\**p* value <0.005 are shown in bold. <sup>a</sup>Late stage included stage III. <sup>b</sup>Early stage included stages I and II. <sup>c</sup>Odds ratio (OR) and 95% confidence intervals (C.I.).

**Supplementary Table S2. Association analysis between germline genetic polymorphisms of *STIM1* and TNM stage in human epidermal growth factor receptor 2 (HER2) positive breast cancer patients**

| dbSNV ID  | Genotype | Late stage <sup>a</sup><br>N (%) | Early stage <sup>b</sup><br>N (%) | Genotype model             |                |
|-----------|----------|----------------------------------|-----------------------------------|----------------------------|----------------|
|           |          |                                  |                                   | OR (95% C.I.) <sup>c</sup> | <i>p</i> value |
| rs2304891 | G/G      | 10 (34.5)                        | 18 (16.4)                         | 4.11 (1.21~13.92)          | 0.0618         |
|           | A/G      | 14 (48.3)                        | 56 (50.9)                         | 1.85 (0.61~5.59)           |                |
|           | A/A      | 5 (17.2)                         | 36 (32.7)                         | Reference                  |                |
| rs3750996 | G/G      | 0 (0)                            | 6 (5.4)                           | 0                          | <b>0.0315*</b> |
|           | A/G      | 5 (16.7)                         | 36 (32.4)                         | 0.38 (0.13~1.07)           |                |
|           | A/A      | 25 (83.3)                        | 69 (62.2)                         | Reference                  |                |
| rs1561876 | G/G      | 1 (3.8)                          | 6 (5.6)                           | 0.87 (0.09~8.29)           | 0.8979         |
|           | A/G      | 13 (50.0)                        | 47 (43.9)                         | 1.21 (0.50~2.92)           |                |
|           | A/A      | 12 (46.2)                        | 54 (50.5)                         | Reference                  |                |
| rs3750994 | G/G      | 2 (7.1)                          | 2 (1.8)                           | 5.17 (0.61~43.91)          | 0.3360         |
|           | T/G      | 9 (32.1)                         | 37 (33.9)                         | 0.97 (0.39~2.41)           |                |
|           | T/T      | 17 (60.7)                        | 70 (64.2)                         | Reference                  |                |

The *p* value was adjusted for age. \**p* value <0.05 are shown in bold. <sup>a</sup>Late stage included stage III. <sup>b</sup>Early stage included stages I and II. <sup>c</sup>Odds ratio (OR) and 95% confidence intervals (C.I.).

**Supplementary Table S3. Expression quantitative trait locus (eQTL) analysis of *STIM1* SNPs**

| Gene  | dbSNP     | alt allele | Tissue               | p-value               | NES <sup>a</sup> |
|-------|-----------|------------|----------------------|-----------------------|------------------|
| STIM1 | rs2304891 | G          | Nerve-Tibial         | 2.70×10 <sup>-9</sup> | 0.17             |
| STIM1 | rs2304891 | G          | Heart-Left Ventricle | 2.10×10 <sup>-8</sup> | 0.22             |

<sup>a</sup>NES: Normalized effect size

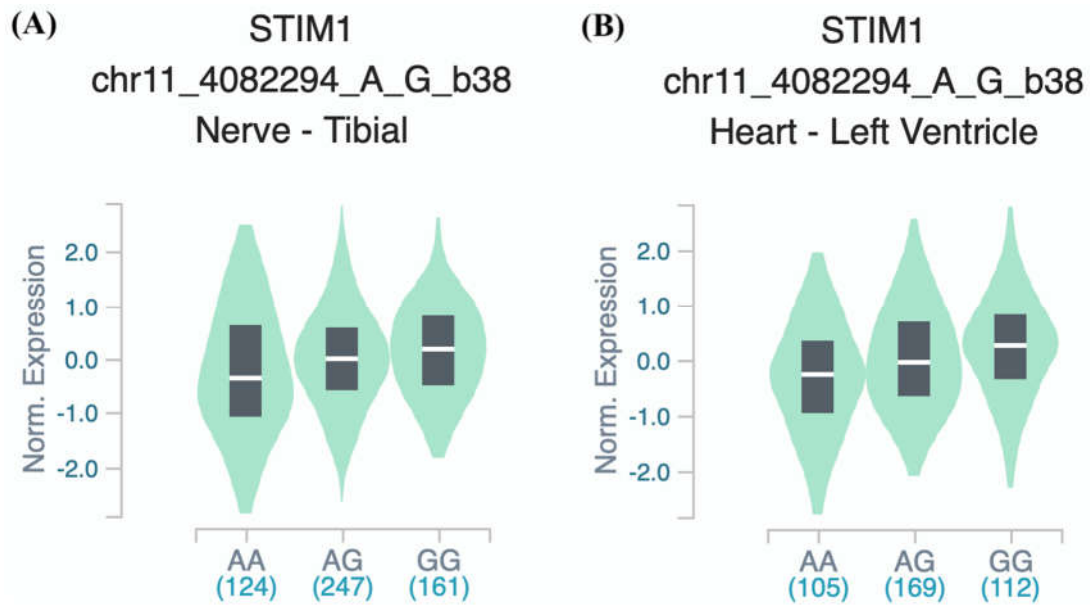

**Supplementary Figure S1. *STIM1* gene expression among different genotypes of rs2304891 in (A) nerve-tibial tissue and (B) heart-left ventricle tissue.**
